# Supplementary material for: Direct preparation of [(CH3)3NC16H33]4Mo8O26 and its catalytic performance in oxidative desulfurization
Source: Royal Society of Chemistry journal article supplement (doi:10.1039/c5cy01439e), 2015-11-12
Supplement: c5cy01439e1.pdf [file c5cy01439e1.pdf]

**Supplementary Information for:**

**Direct preparation of  $[(\text{CH}_3)_3\text{NC}_{16}\text{H}_{33}]_4\text{Mo}_8\text{O}_{26}$  and its catalytic performance in oxidative desulfurization**

*Xiangwen Zhang, Yawei Shi and Guozhu Liu\**

Key Laboratory for Green Chemical Technology of Ministry of Education, School of Chemical Engineering and Technology, Collaborative Innovation Center of Chemical Science and Engineering (Tianjin), Tianjin University, Tianjin 300072, China

\*Corresponding author. Tel. /fax: +86 22 27892340.

E-mail address: gliu@tju.edu.cn (G. Liu)

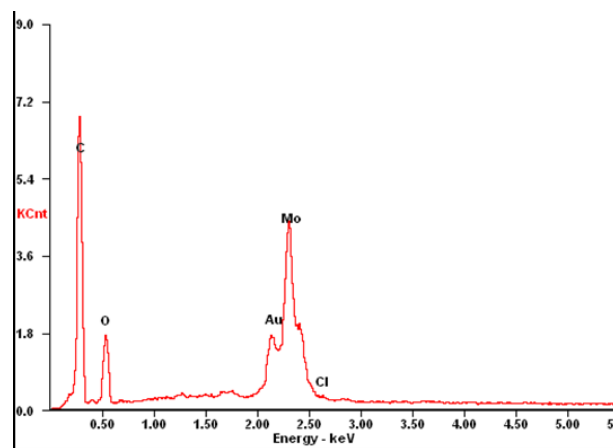

Fig.S1 EDS spectrum of the catalyst

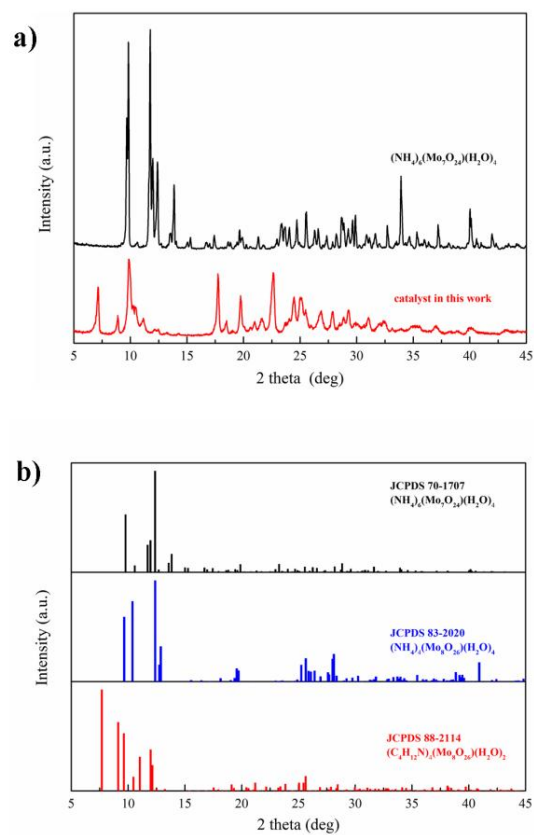

Fig.S2 XRD patterns of the precursor and the catalyst (a) together with some standard XRD patterns (b)

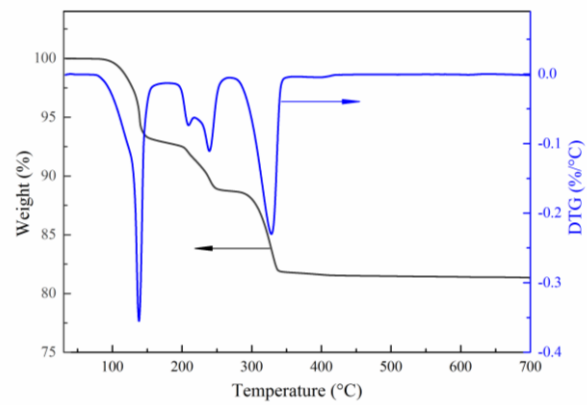

Fig.S3 TG/DTG curve of the  $[(\text{CH}_3)_3\text{NC}_{16}\text{H}_{33}]_6\text{Mo}_7\text{O}_{24}$  precursor

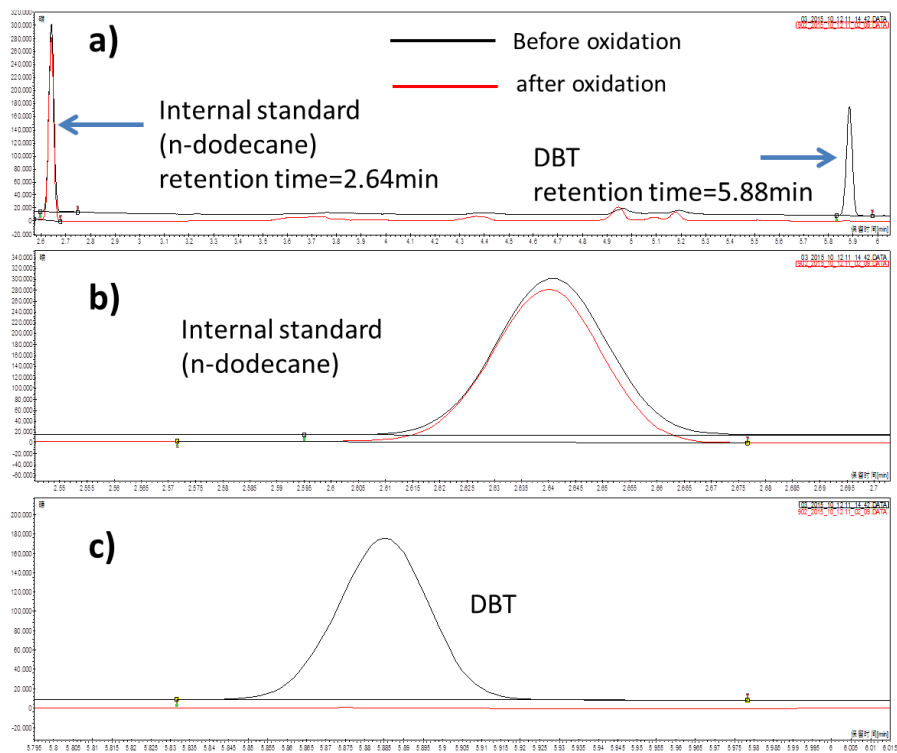

Fig. S4 GC profiles for the model fuel before and after oxidation (Experimental conditions: initial sulfur concentration=500ppmWS, temperature=60 °C, catalyst/oil =0.613%, O/S=5, time=90min)

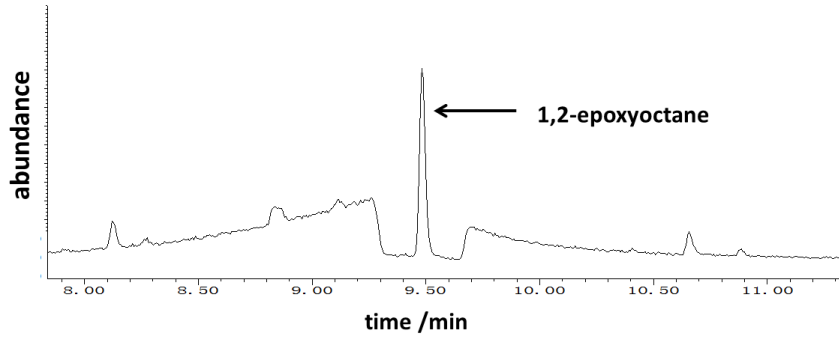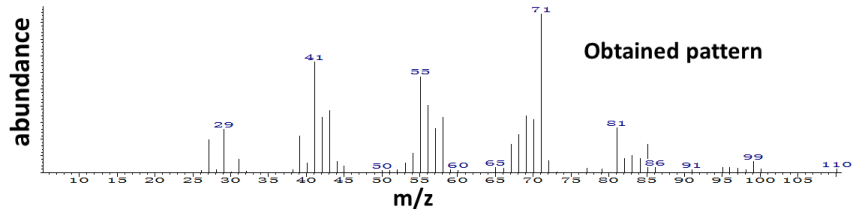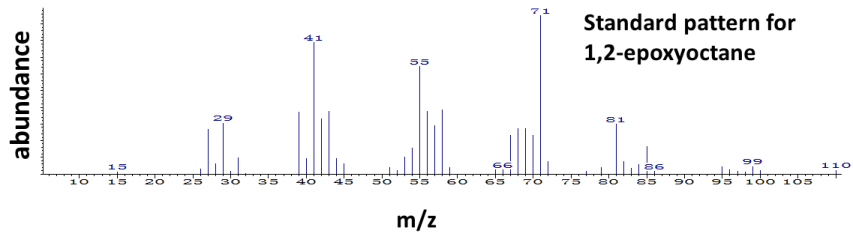

Fig.S5 GC-MS analysis of oil phase.

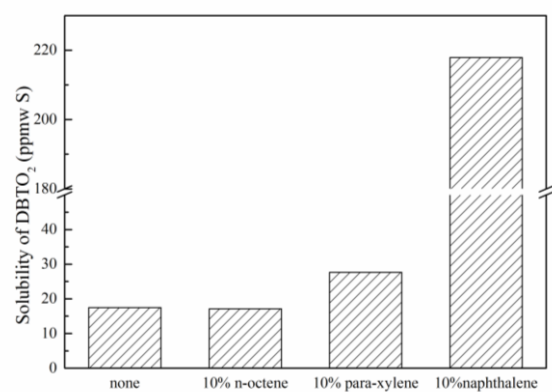

Fig.S6 Solubilities of DBTO<sub>2</sub> in different solvents. (Compositions: pure *n*-octane, or  $x/\text{octane}=1:9$  in mass,  $x=n$ -octene, *para*-xylene or naphthalene)

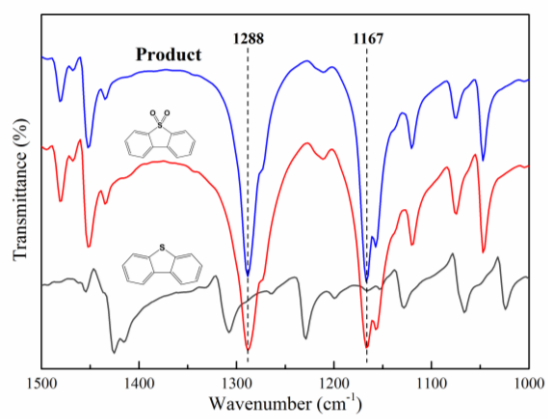

Fig.S7 FTIR spectra of DBT, DBTO<sub>2</sub> and the product



Table S1 Comparison of CHN elemental contents with the calculated ones

|                                                                                       | C <sup>a</sup> | H <sup>a</sup> | N <sup>a</sup> |
|---------------------------------------------------------------------------------------|----------------|----------------|----------------|
| $[(\text{CH}_3)_3\text{NC}_{16}\text{H}_{33}]_6\text{Mo}_7\text{O}_{24}$ <sup>b</sup> | 49.6           | 9.1            | 3.0            |
| $[(\text{CH}_3)_3\text{NC}_{16}\text{H}_{33}]_4\text{Mo}_8\text{O}_{26}$ <sup>b</sup> | 39.3           | 7.2            | 2.4            |
| Catalyst <sup>c</sup>                                                                 | 39.4           | 7.2            | 2.2            |

<sup>a</sup> Measured in wt.%

<sup>b</sup> Calculated values

<sup>c</sup> Obtained by CHN elemental analysis
